# Supplementary material for: A cylinder-shaped macrocycle formed via Friedel–Crafts reaction
Source: Royal Society of Chemistry journal article supplement (doi:10.1039/d1cc00498k), 2021-01-01
Supplement: d1cc00498k1.pdf [file d1cc00498k1.pdf]

**Electronic Supplementary Information**

**A Cylinder-Shaped Macrocyclic Formed  
via Friedel-Crafts Reaction**

Dingsheng Zhu, Shuai Fang, Lu Tong, Ye Lei, Guangcheng Wu, Tayba Chudhary and Hao Li\*

*Department of Chemistry, Zhejiang University, Hangzhou 310027, P. R. China.*

*E-mail: lihao2015@zju.edu.cn*

**Table of content**

|                                              |            |
|----------------------------------------------|------------|
| <b>1. Materials and general methods.....</b> | <b>S2</b>  |
| <b>2. Synthetic procedures .....</b>         | <b>S3</b>  |
| <b>3. Characterization .....</b>             | <b>S4</b>  |
| <b>4. <sup>1</sup>H NMR titration .....</b>  | <b>S10</b> |
| <b>5. Reaction monitoring .....</b>          | <b>S15</b> |
| <b>6. Diels-Alder reactivity of 1.....</b>   | <b>S16</b> |
| <b>7. X-ray crystallography.....</b>         | <b>S17</b> |
| <b>8. References.....</b>                    | <b>S24</b> |

## 1. Materials and general methods

All reagents and solvents were purchased from commercial sources and used without further purification. Manipulations were performed under a normal atmosphere unless otherwise indicated. The cage precursor 1,3,5-tri(furan-2-yl) benzene (**TFB**) was prepared according to reported procedure<sup>[S1]</sup>. Nuclear magnetic resonance (NMR) spectra were recorded at ambient temperature using Bruker AVANCE III 400/500 and Agilent DD2 600 spectrometers, with working frequencies of 400/500/600 and 100/125/150 MHz for <sup>1</sup>H and <sup>13</sup>C, respectively. Chemical shifts are reported in ppm relative to the residual internal non-deuterated solvent signals (CDCl<sub>3</sub>:  $\delta = 7.26$  ppm). High-resolution mass spectra (HRMS) were recorded on a Fourier transform ion cyclotron resonance mass spectrometry (FT-ICR MS). X-ray crystallographic data were collected on a Bruker D8 Venture diffractometer.

## 2. Synthetic procedures

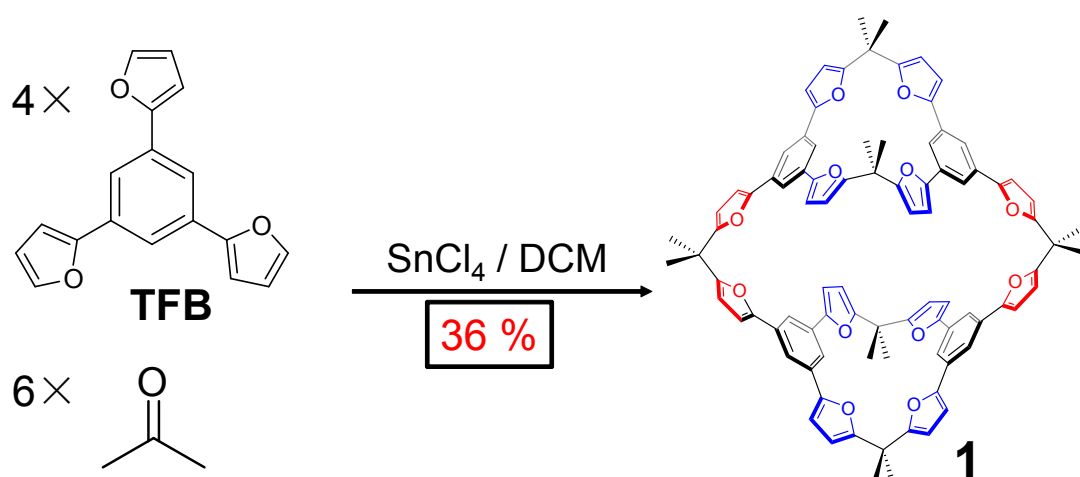

**Figure S1.** Synthesis of **1**

### Synthesis of **1**

1,3,5-tri(furan-2-yl) benzene (TFB) (200 mg, 0.72 mmol) and acetone (0.239 mL, 3.26 mmol) were dissolved in anhydrous dichloromethane (48 mL). SnCl<sub>4</sub> (0.256 mL, 2.17 mmol) was added slowly. The reaction mixture was stirred under the protection of a N<sub>2</sub> atmosphere at 298K. The progress of the reaction was monitored by TLC. After the reaction reached its equilibrium after 72 h, the reaction mixture was poured into cold water (100 mL), which was extracted with DCM (40 mL × 2). The organic layer was washed with saturated aqueous solution of NaHCO<sub>3</sub> (100 mL) and brine water (100 mL). After drying with Na<sub>2</sub>SO<sub>4</sub>, the solvent was removed under vacuum. The crude product was purified by column chromatography (silica gel: ethyl acetate/petroleum ether = 1:5) to obtain **1** as an off-white powder (87 mg, 36%). R<sub>f</sub> = 0.76, ethyl acetate/petroleum ether = 1:3. Elem. anal. : observed: C 73.83% H 5.78%, calculated: C 80.34% H 5.19% . <sup>1</sup>H NMR (600 MHz, CDCl<sub>3</sub>): δ 8.13 (8.12 (t, *J* = 1.6 Hz, 4H)), 7.48 (d, *J* = 1.7 Hz, 8H), 6.57 (d, *J* = 3.3 Hz, 4H), 6.50 (d, *J* = 3.3 Hz, 8H), 6.23 (d, *J* = 3.4 Hz, 4H), 6.09 (d, *J* = 3.4 Hz, 8H), 1.89 (s, 12H), 1.77 (s, 12H), 1.73 (s, 12H). <sup>13</sup>C NMR (CDCl<sub>3</sub>, 600 MHz): δ 160.1 (C), δ 159.9 (C), δ 158.8 (C), δ 152.3 (C), δ 132.0 (C), δ 131.5 (C), δ 117.0 (CH), 116.5 (CH), 106.2 (CH), 106.1 (CH), 106.0 (CH), 105.2 (CH), 37.7 (C), 37.1(C), 26.8 (CH<sub>3</sub>), 26.2 (CH<sub>3</sub>), 24.9 (CH<sub>3</sub>). ESI-HRMS: [M+H]<sup>+</sup>, observed: *m/z* 1345.5044, calculated: *m/z* 1345.5097; [M+Na]<sup>+</sup>, observed: *m/z* 1367.4838, calculated: *m/z* 1367.4916; [M+K]<sup>+</sup>, observed: *m/z* 1383.4545, calculated: *m/z* 1383.4655. IR: 3455.54 cm<sup>-1</sup>, 2975.44 cm<sup>-1</sup>, 2933.22 cm<sup>-1</sup>, 1611.31 cm<sup>-1</sup>, 1586.36 scm<sup>-1</sup>, 1542.14 cm<sup>-1</sup>, 1210.39 cm<sup>-1</sup>, 1586.36 cm<sup>-1</sup>, 1542.14 cm<sup>-1</sup>, 1255.63 cm<sup>-1</sup>, 1210.39 cm<sup>-1</sup>, 1025.44 cm<sup>-1</sup>, 781.67 cm<sup>-1</sup>, 757.27 cm<sup>-1</sup>.

### 3. Characterization

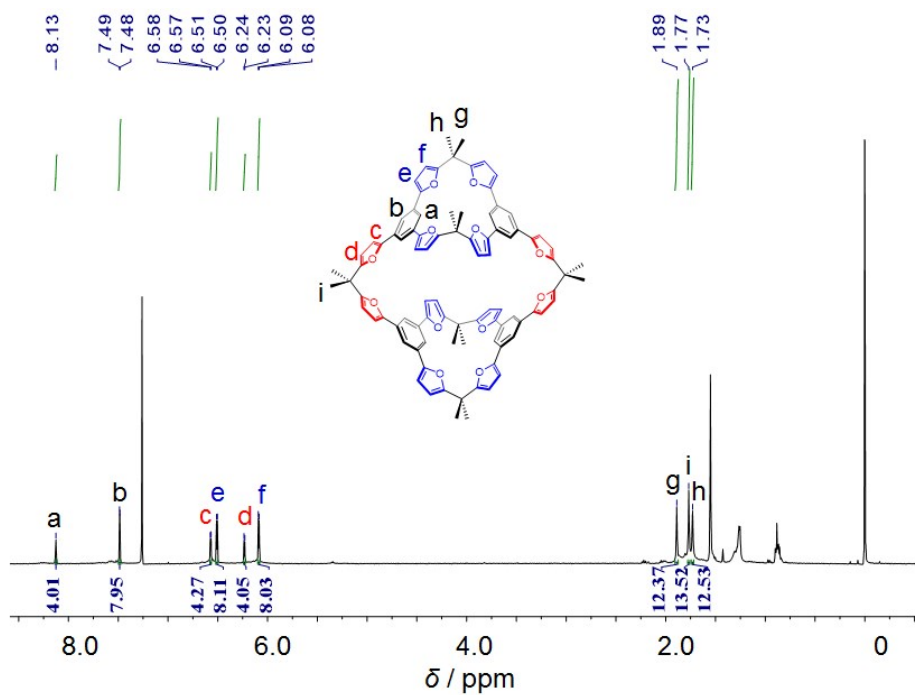

**Figure S2.** <sup>1</sup>H NMR spectrum of **1** (CDCl<sub>3</sub>, 600 MHz, 298 K).

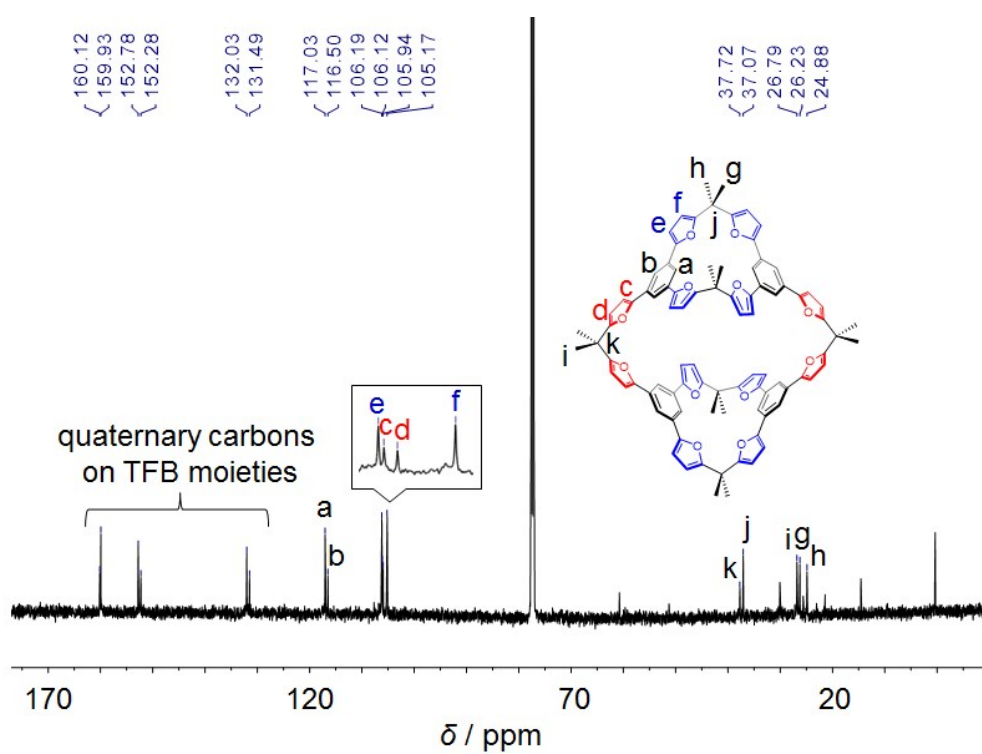

**Figure S3.** <sup>13</sup>C NMR spectrum of **1** (CDCl<sub>3</sub>, 150 MHz, 298 K).

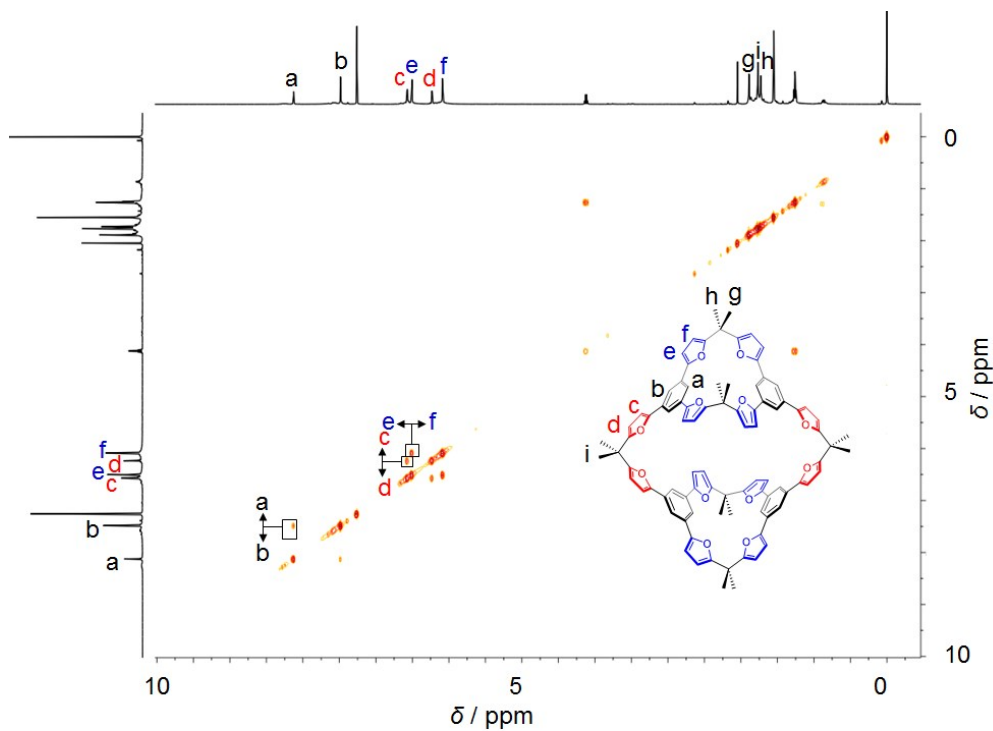

**Figure S4.**  $^1\text{H}$ - $^1\text{H}$  COSY NMR spectrum of **1** ( $\text{CDCl}_3$ , 500 MHz, 298 K). Key correlation peaks are labeled in the spectrum.

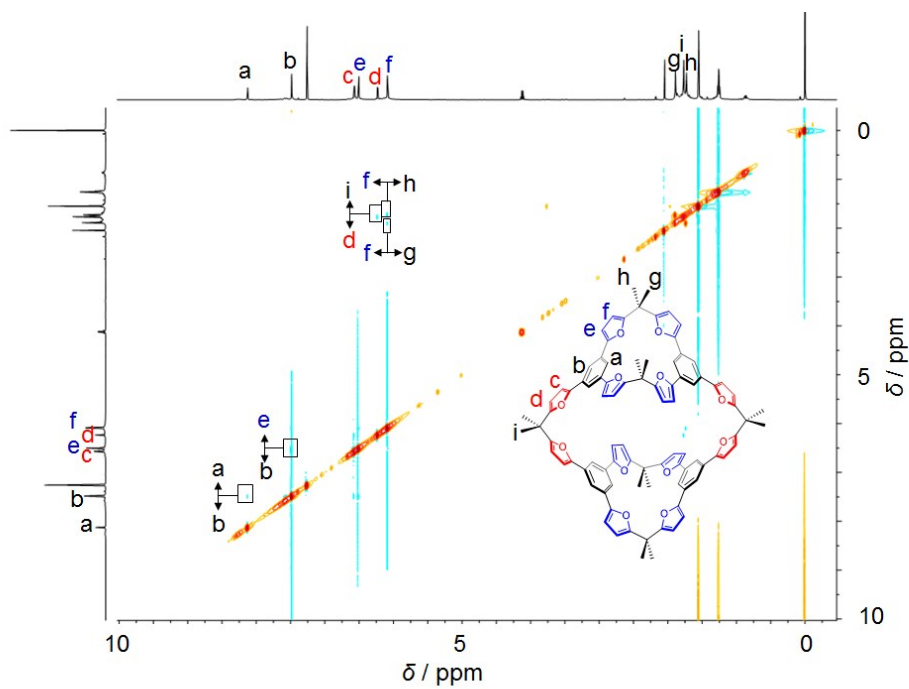

**Figure S5.**  $^1\text{H}$ - $^1\text{H}$  NOESY NMR spectrum of **1** ( $\text{CDCl}_3$ , 500 MHz, 298 K). Key correlation peaks are labeled in the spectrum. Mixing time: 0.5 s.

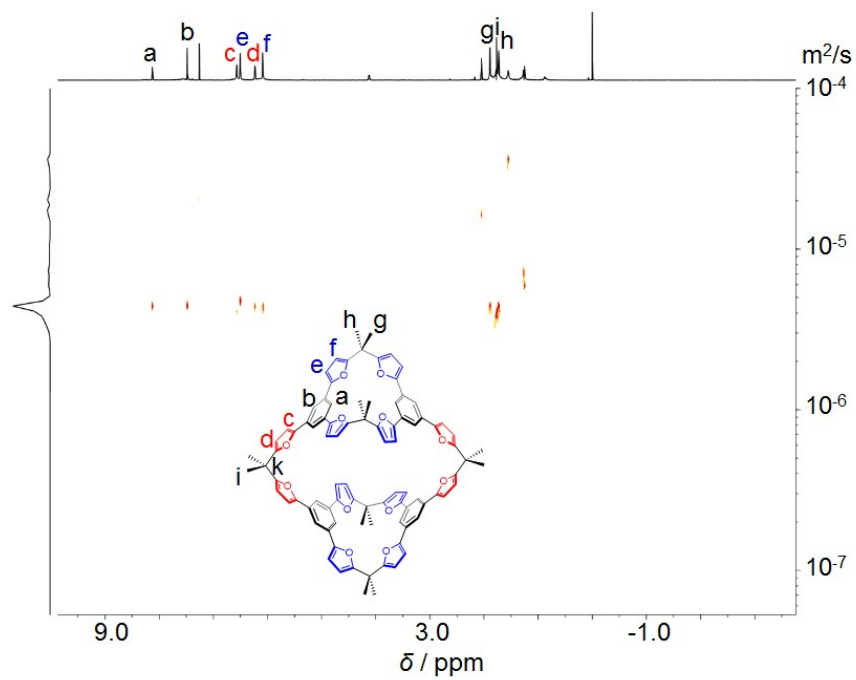

**Figure S6.**  $^1\text{H}$  DOSY NMR spectrum of **1** ( $\text{CDCl}_3$ , 500 MHz, 298 K).

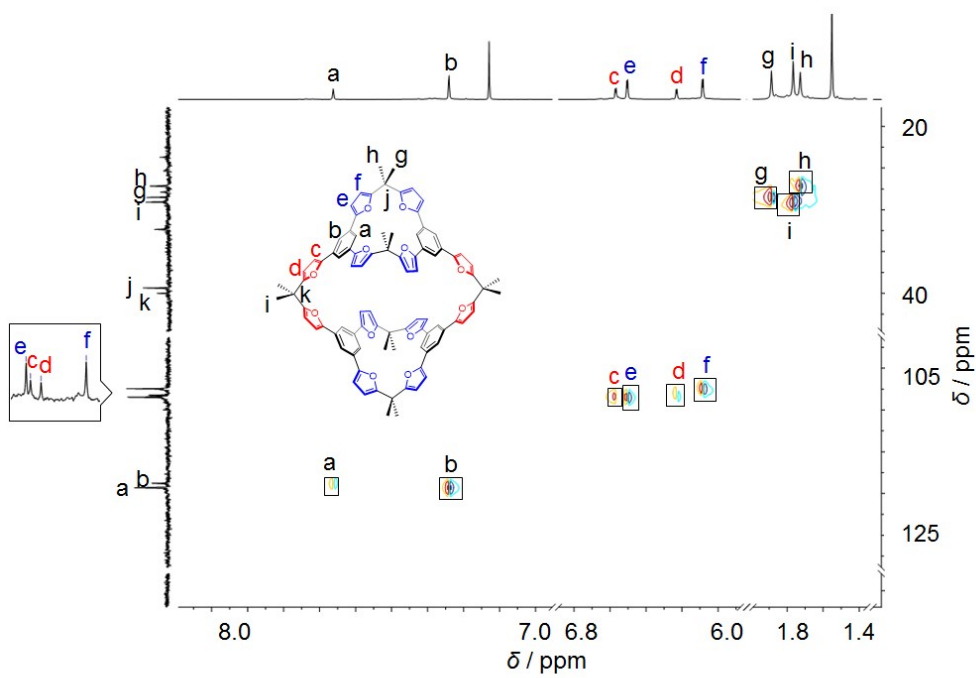

**Figure S7.**  $^1\text{H}$ - $^{13}\text{C}$  HSQC NMR spectrum of **1** ( $\text{CDCl}_3$ , 500 MHz, 298 K).

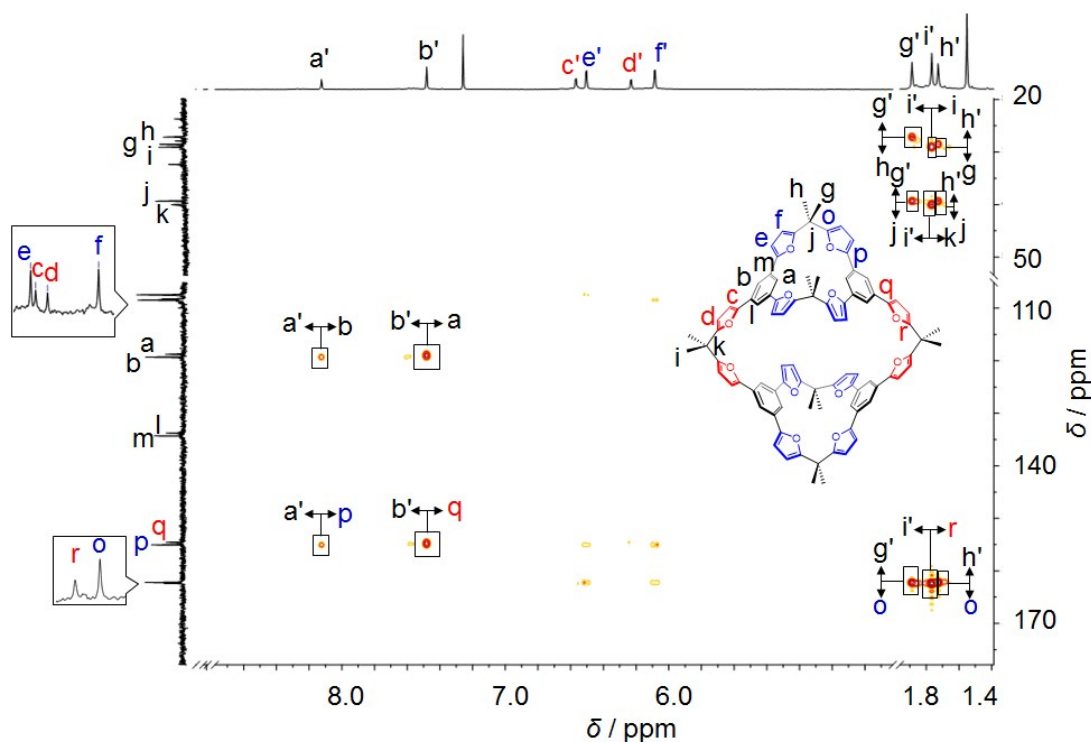

**Figure S8.**  $^1\text{H}$ - $^{13}\text{C}$  HMBC NMR spectrum of **1** ( $\text{CDCl}_3$ , 500 MHz, 298 K).

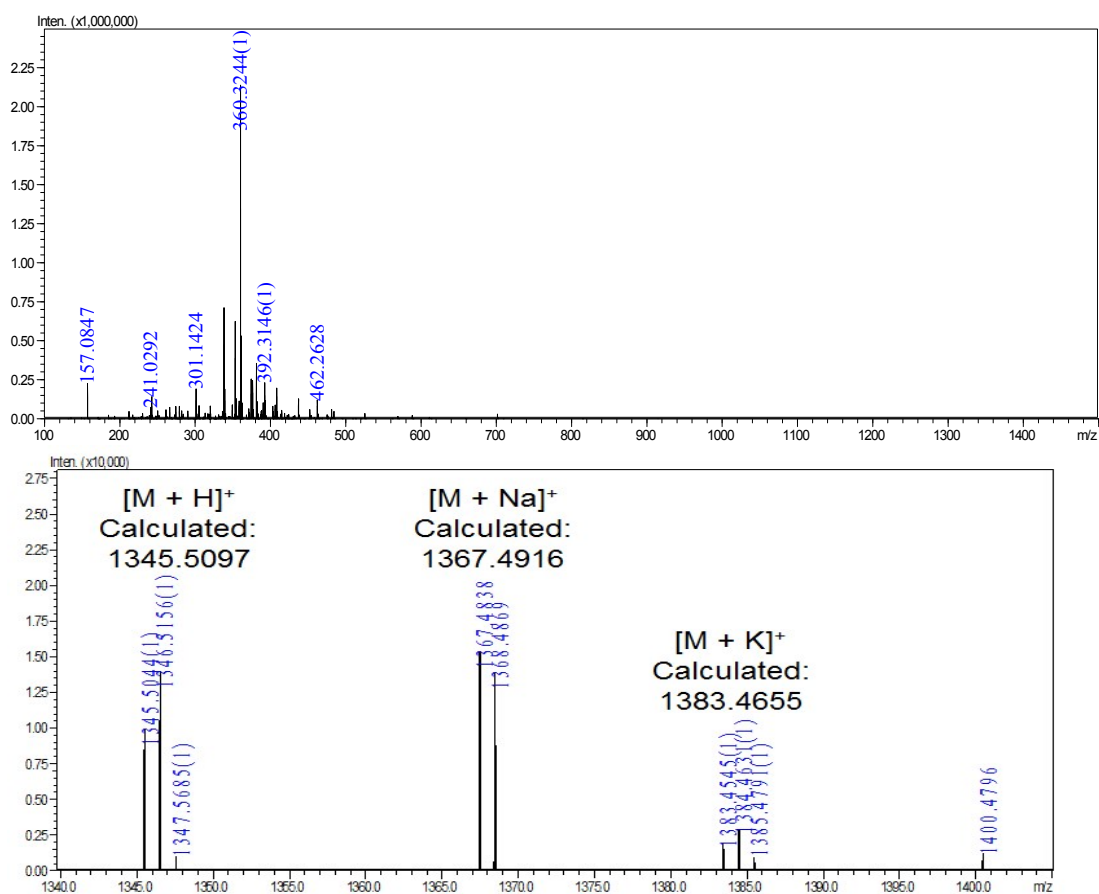

**Figure S9.** ESI-HRMS of **1**, full range (top), and expanded (bottom). Molecular ions bearing one positive charge by taking proton, sodium and potassium cations are observed.

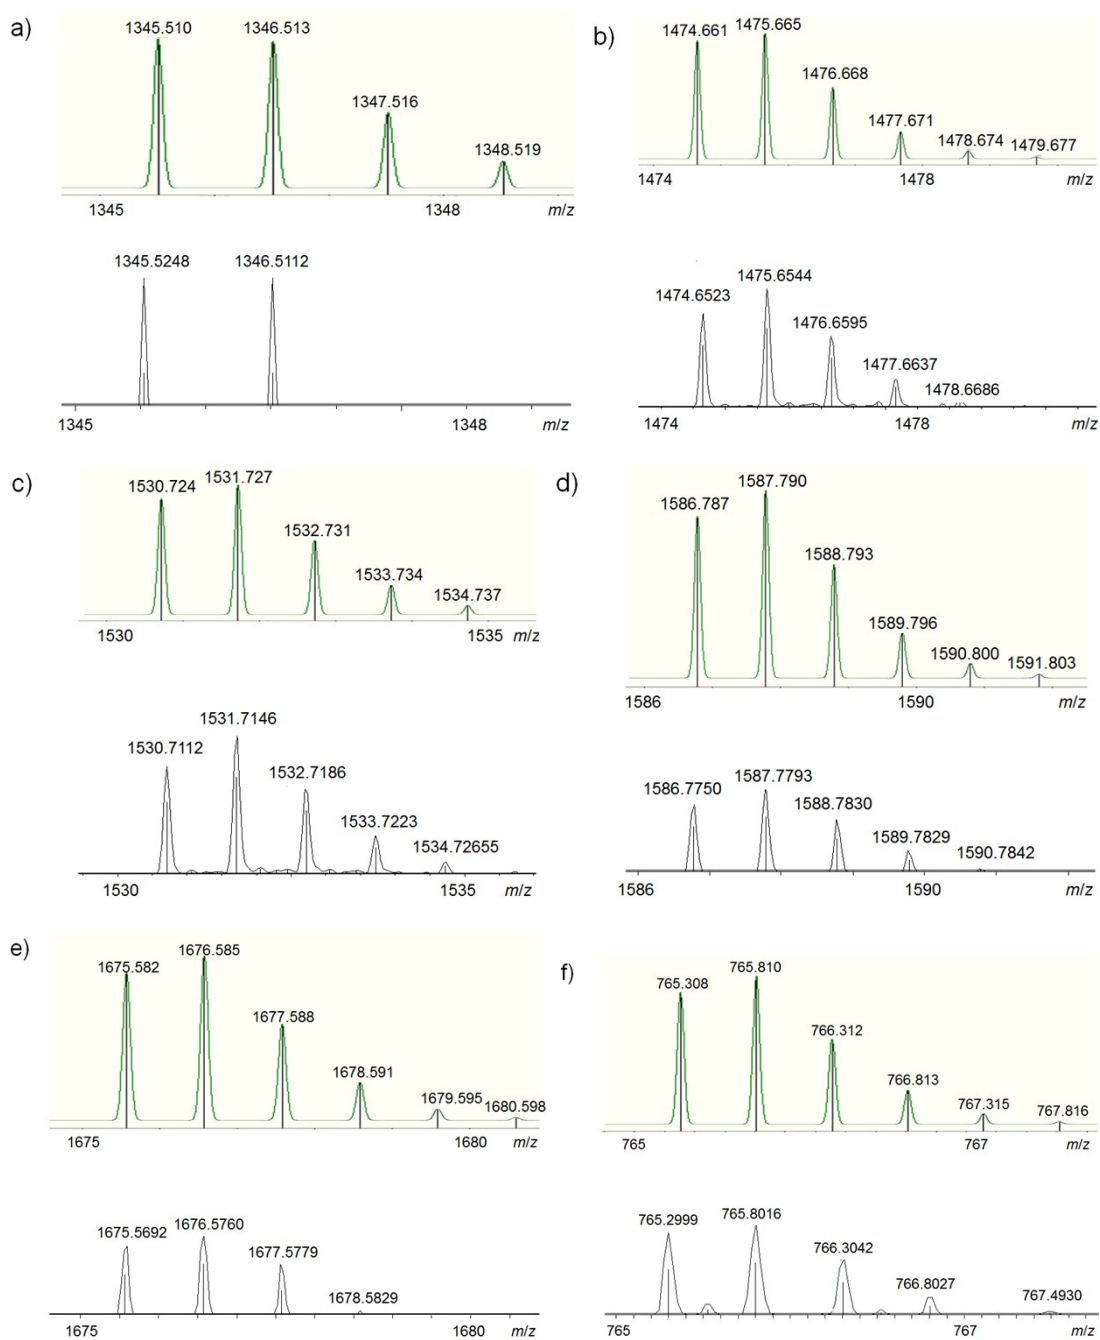

**Figure S10.** Experimental (bottom) and simulated (top) isotopic patterns of the peaks in ESI-HRMS, corresponding to a)  $[M + H]^+$ ; b)  $[M + TEA]^+$ ; c)  $[M + TPA]^+$ ; d)  $[M + TBA]^+$ ; e)  $[M + \text{viologen}]^+$ ; f)  $[M + \text{viologen} + PF_6^-]^+$ . **M** is referred to as the macrocycle **1**.



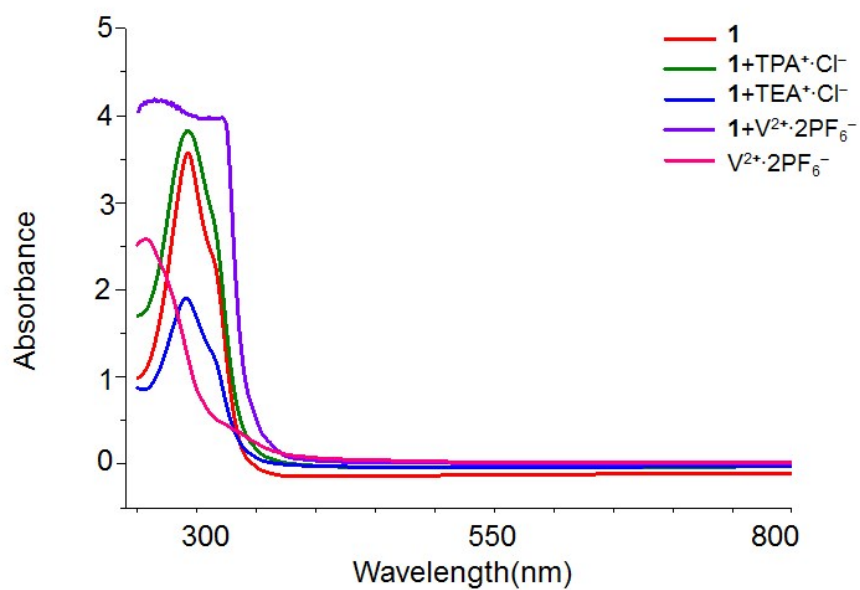

**Figure S11.** UV-Vis absorption spectrum of the macrocycle **1** in the absence and presence of guest. No charge-transfer bands in the visible light region were observed.

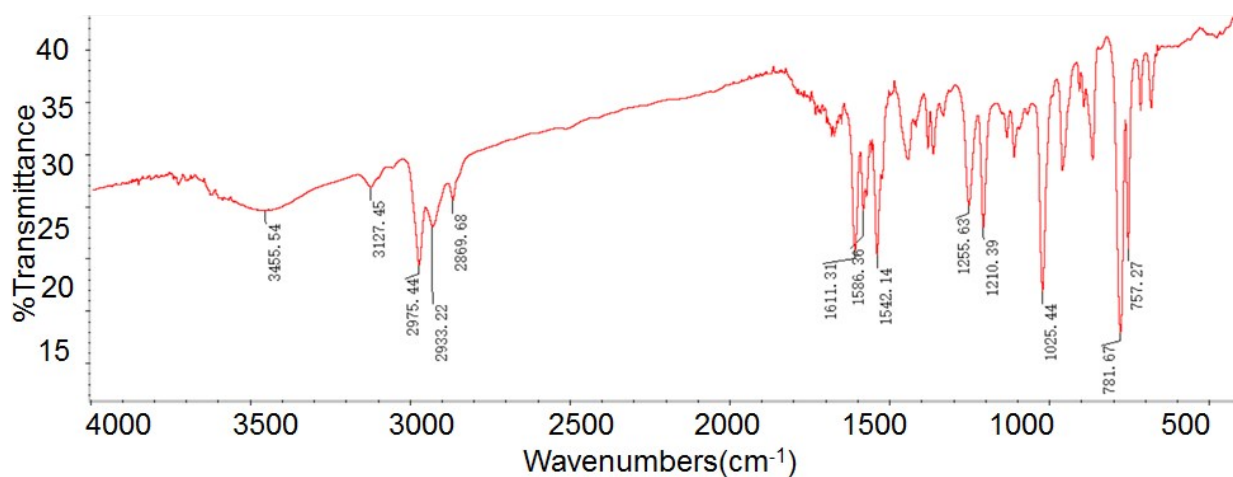

**Figure S12.** IR spectrum of **1**.

#### 4. <sup>1</sup>H NMR titration

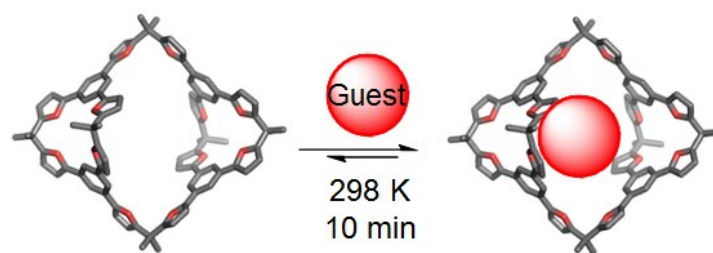

Fast Host-guest exchange on the NMR time scale was observed, as inferred from the results that before and after adding guests, only one set of peaks corresponding to the host and guests were observed. Binding affinities of the host-guest complexes were calculated by using <sup>1</sup>H NMR spectroscopic titration experiments. Solvent is either CDCl<sub>3</sub> for tetraalkylammonium chloride or 1:1 mixture of CDCl<sub>3</sub> and CD<sub>3</sub>CN in the case of viologen whose counterion is PF<sub>6</sub><sup>-</sup>. In all samples during titration, the concentration of the cage **1** was kept constant. The association constants ( $K_a$ ) could be derived from a plot of the resonance changes of a proton on the host cage **1** versus the concentration of the guest added into the solution of the cage **1**.  $K_a$  was calculated by using the plot to fit in the following equation<sup>[s2]</sup>:

$$A = ((1+1/K_a/[H]_0+[G]/[H]_0) - A_\infty((1+1/K_a/[H]_0+[G]/[H]_0)^2 - 4[G]/[H]_0)^{0.5})/2$$

Where  $A$  is the resonance changes of the aromatic proton on **1** host in the presence of the guest whose concentration is  $[G]$ ,  $A_\infty$  is the chemical shift change of H<sub>c</sub> when the cavity of the host is completely occupied by the guest, and  $[H]_0$  is the concentration of the host which was kept constant.

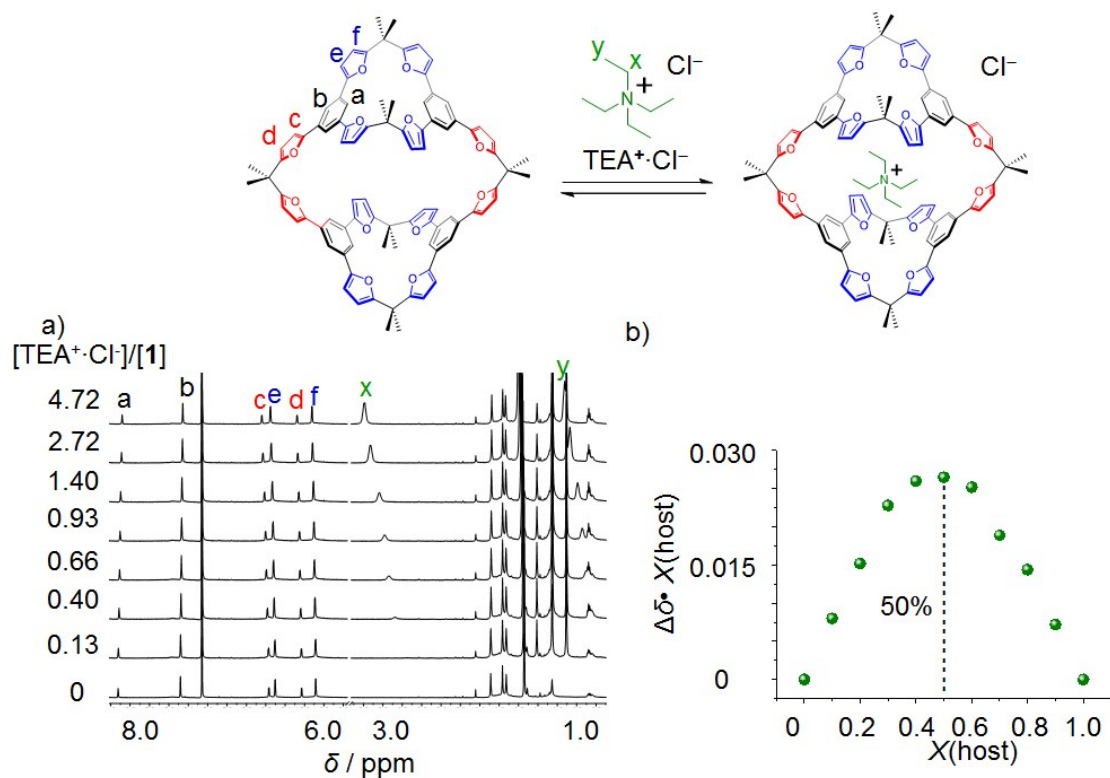

**Figure S13.** a) Partial <sup>1</sup>H NMR spectra (CDCl<sub>3</sub>, 298K, 500 MHz) of **1** (1 mM) upon adding tetraethylammonium chloride (TEA<sup>+</sup>·Cl<sup>-</sup>) with different concentrations. b) A Job plot of Δδ · X(host) versus X(host). In all the <sup>1</sup>H NMR spectroscopic experiments for making Job plot, [**1**] + [TEA<sup>+</sup>·Cl<sup>-</sup>] = 1 mM, and the Δδ of the proton H<sub>c</sub> was used to make the Job plot.

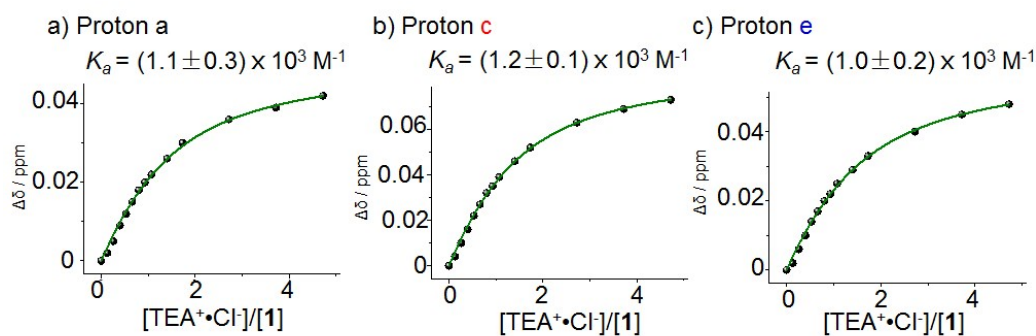

**Figure S14.** Plots of the upfield shifts of the resonance corresponding to protons H<sub>a</sub>, H<sub>c</sub> and H<sub>e</sub> versus [TEA<sup>+</sup>·Cl<sup>-</sup>]/[**1**], respectively, based on <sup>1</sup>H NMR spectroscopic results in Figure S13a. K<sub>a</sub> of **1** to recognize TPA<sup>+</sup> was calculated to be (1.1 in Fi × 10<sup>3</sup> M<sup>-1</sup>), by averaging the three numbers.

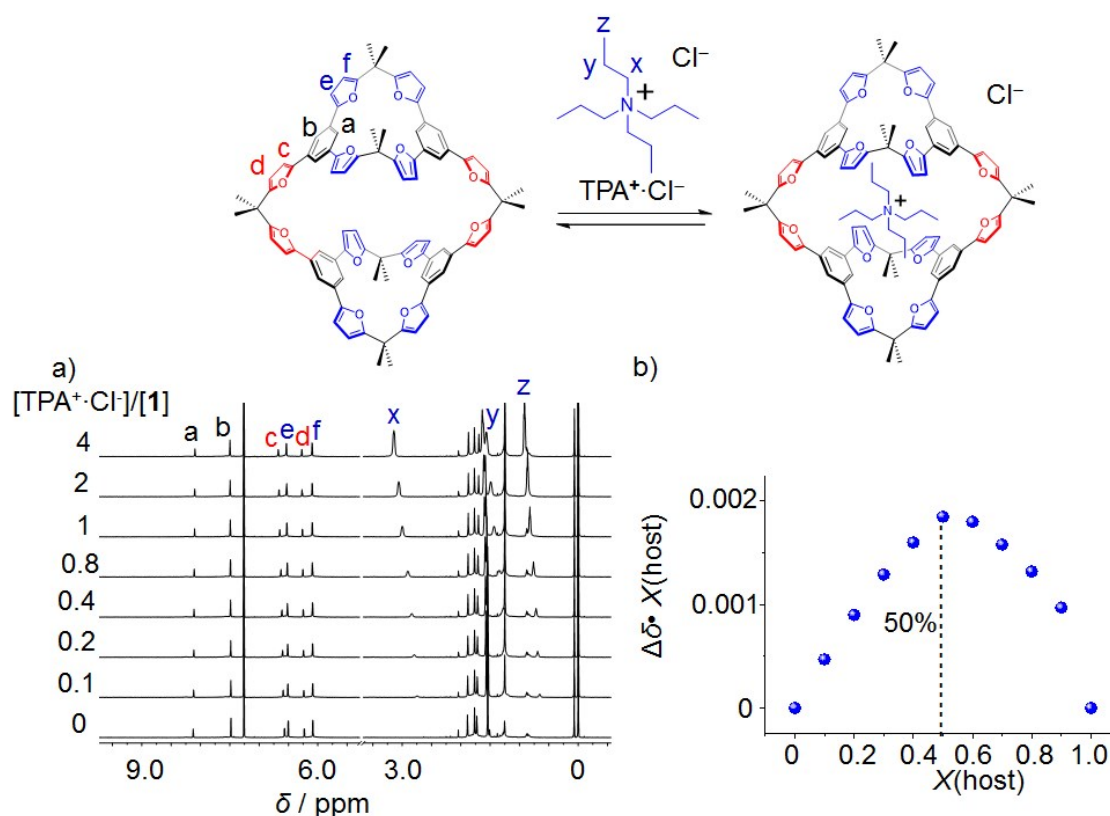

**Figure S15.** a) Partial  $^1\text{H}$  NMR spectra ( $\text{CDCl}_3$ , 298K, 500 MHz) of **1** (1 mM) upon adding tetraethylammonium chloride ( $\text{TPA}^+\cdot\text{Cl}^-$ ) with different concentrations. b) A Job plot of  $\Delta\delta \cdot X(\text{host})$  versus  $X(\text{host})$ . In all the  $^1\text{H}$  NMR spectroscopic experiments for making Job plot,  $[\mathbf{1}] + [\text{TPA}^+\cdot\text{Cl}^-] = 1 \text{ mM}$ , and the  $\Delta\delta$  of the proton  $\text{H}_d$  was used to make the Job plot.

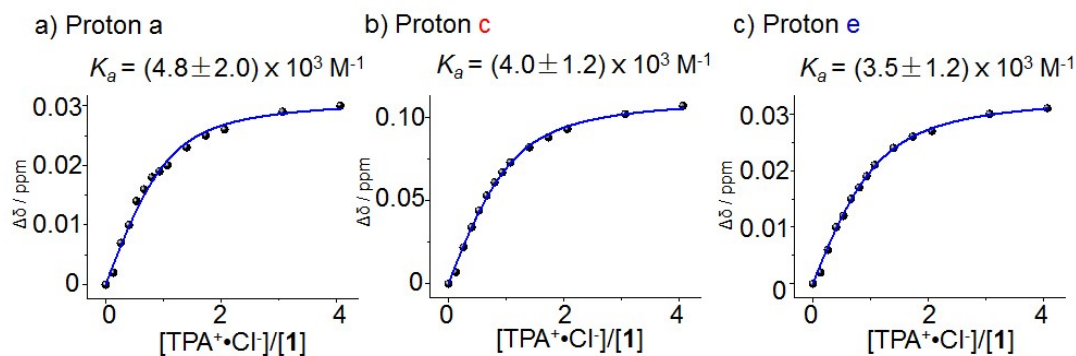

**Figure S16.** Plot of the upfield shifts of the resonance corresponding to protons  $\text{H}_a$ ,  $\text{H}_c$  and  $\text{H}_e$  versus  $[\text{TPA}^+\cdot\text{Cl}^-]/[\mathbf{1}]$ , respectively, based on  $^1\text{H}$  NMR spectroscopic results in Figure S15a.  $K_a$  of **1** to recognize  $\text{TPA}^+$  was calculated to be  $(4.1 \text{ in } \text{Fi} \times 10^3 \text{ M}^{-1})$ , by averaging the three numbers.

**F**

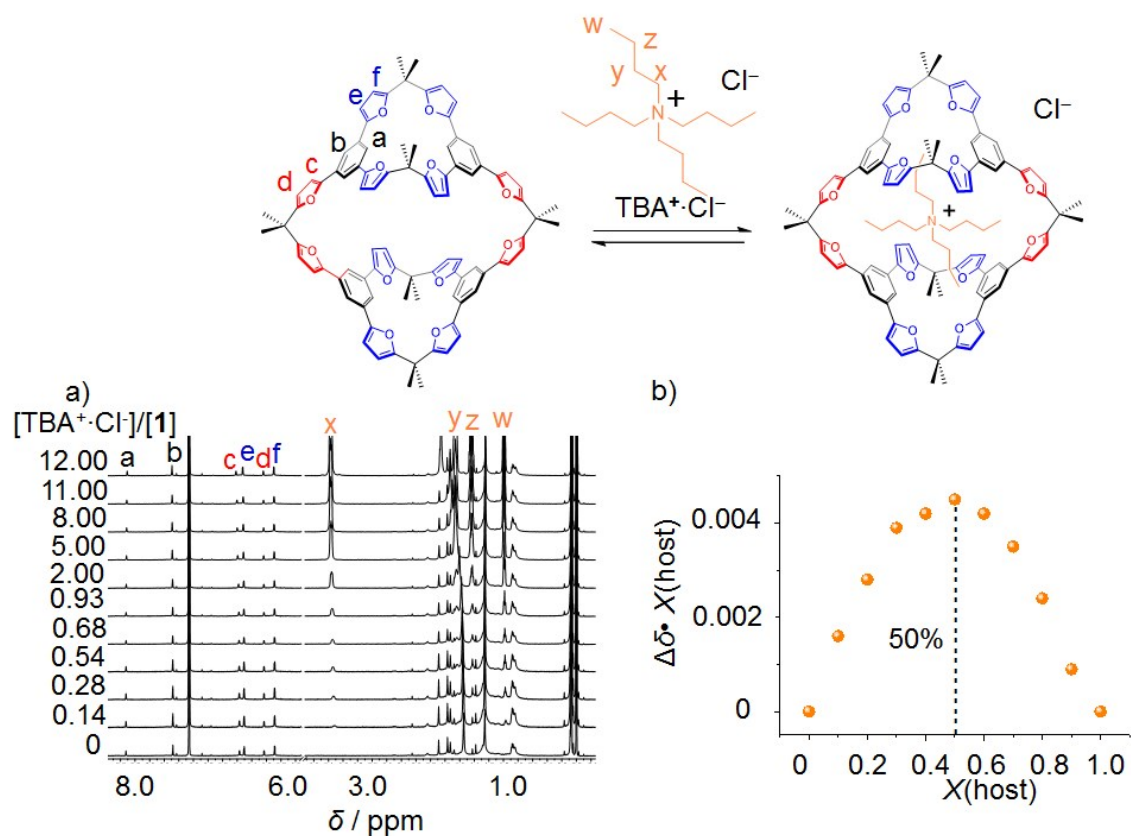

**Figure S17.** a) Partial  $^1\text{H}$  NMR spectra ( $\text{CDCl}_3$ , 298K, 500 MHz) of **1** (1 mM) upon adding tetraethylammonium chloride ( $\text{TBA}^+\cdot\text{Cl}^-$ ) with different concentrations. b) A Job plot of  $\Delta\delta \cdot X(\text{host})$  versus  $X(\text{host})$ . In all the  $^1\text{H}$  NMR spectroscopic experiments for making Job plot,  $[\mathbf{1}] + [\text{TBA}^+\cdot\text{Cl}^-] = 1 \text{ mM}$ , and the  $\Delta\delta$  of the proton  $\text{H}_c$  was used to make the Job plot.

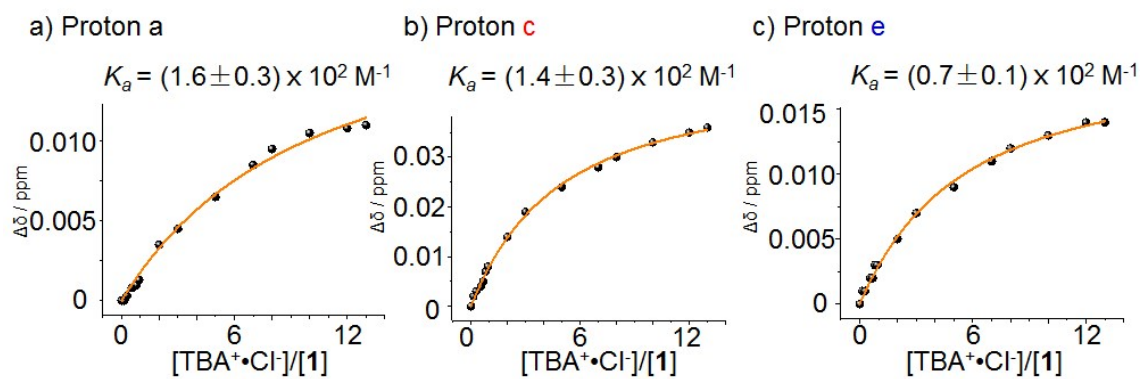

**Figure S18.** Plot of the upfield shifts of the resonance corresponding to protons  $\text{H}_a$ ,  $\text{H}_c$  and  $\text{H}_e$  versus  $[\text{TBA}^+\cdot\text{Cl}^-]/[\mathbf{1}]$ , respectively, based on  $^1\text{H}$  NMR spectroscopic results in Figure S17.  $K_a$  of **1** to recognize  $\text{TBA}^+$  was calculated to be  $(1.2 \pm 0.2) \times 10^2 \text{ M}^{-1}$ , by averaging the three numbers.

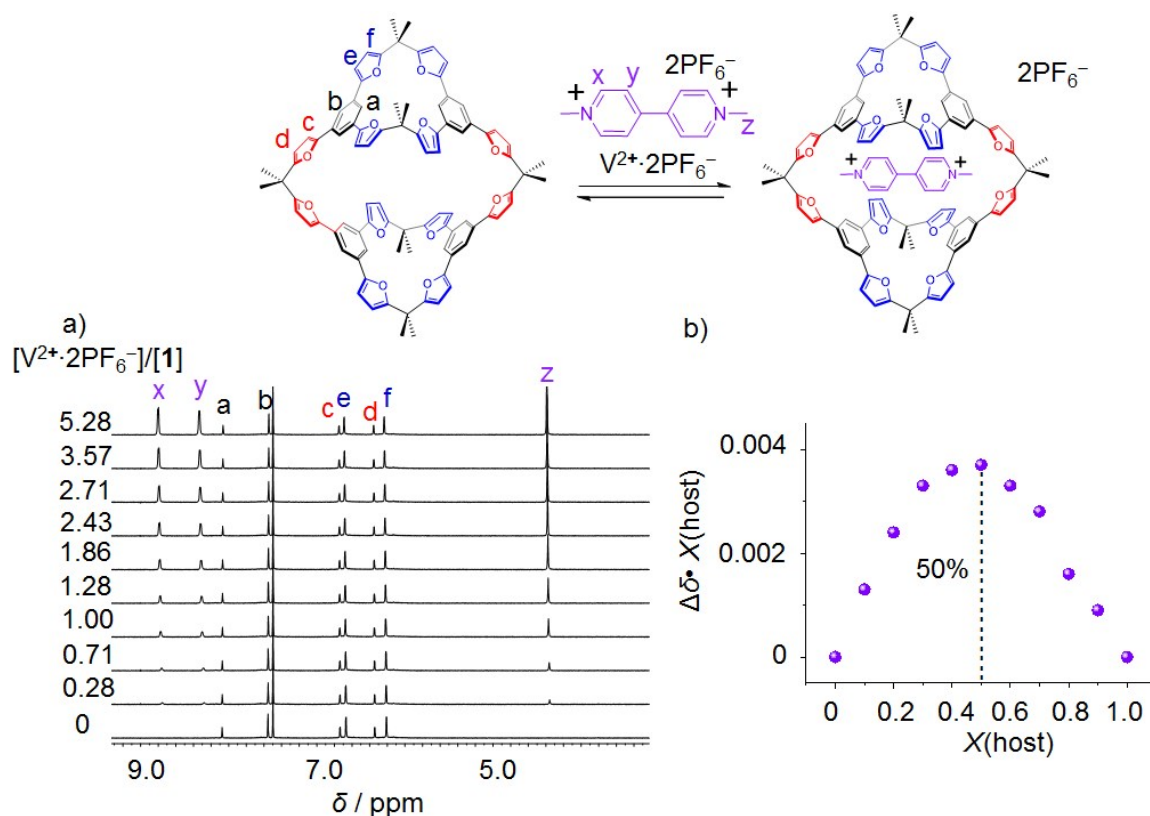

**Figure S19.** a) Partial  $^1\text{H}$  NMR spectra ( $\text{CDCl}_3:\text{CD}_3\text{CN} = 1:1$ , 298K, 500 MHz) of **1** (1 mM) upon adding viologen whose counterion is  $\text{PF}_6^-$  with different concentrations. b) A Job plot of  $\Delta\delta \cdot X(\text{host})$  versus  $X(\text{host})$ . In all the  $^1\text{H}$  NMR spectroscopic experiments for making Job plot,  $[\mathbf{1}] + [\text{V}^{2+} \cdot \text{PF}_6^-] = 1 \text{ mM}$ , and the  $\Delta\delta$  of the proton  $\text{H}_c$  was used to make the Job plot.

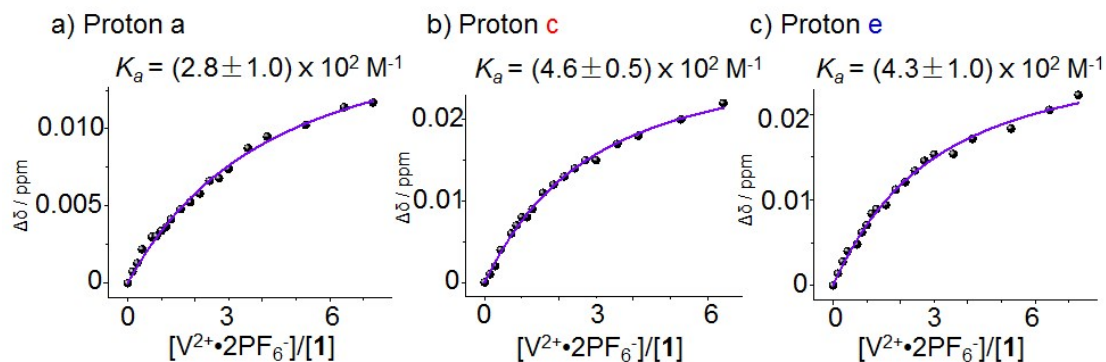

**Figure S20.** Plot of the upfield shifts of the resonance corresponding to protons  $\text{H}_a$ ,  $\text{H}_c$  and  $\text{H}_e$  versus  $[\text{viologen}]/[\mathbf{1}]$ , respectively, based on  $^1\text{H}$  NMR spectroscopic results in Figure S19.  $K_a$  of **1** to recognize  $\text{V}^{2+}$  was calculated to be  $(3.9 \text{ in } \text{Fi} \times 10^2 \text{ M}^{-1})$ , by averaging the three numbers.



## 5. Reaction monitoring

**Method:** 1,3,5-tri(furan-2-yl) benzene (TFB) (200 mg, 0.72 mmol) and acetone (0.239 mL, 3.26 mmol) were dissolved in anhydrous dichloromethane (48 mL). SnCl<sub>4</sub> (0.256 mL, 2.17 mmol) was added slowly. For a specific reaction time, we took 1 mL solution out from the reaction flask, and used water to quench the reaction. The mixture was then extracted with DCM. The organic layers were combined and then the organic solvent was removed under vacuum. The residue was dissolved in 0.5 mL CDCl<sub>3</sub> and the <sup>1</sup>H NMR spectrum was recorded.

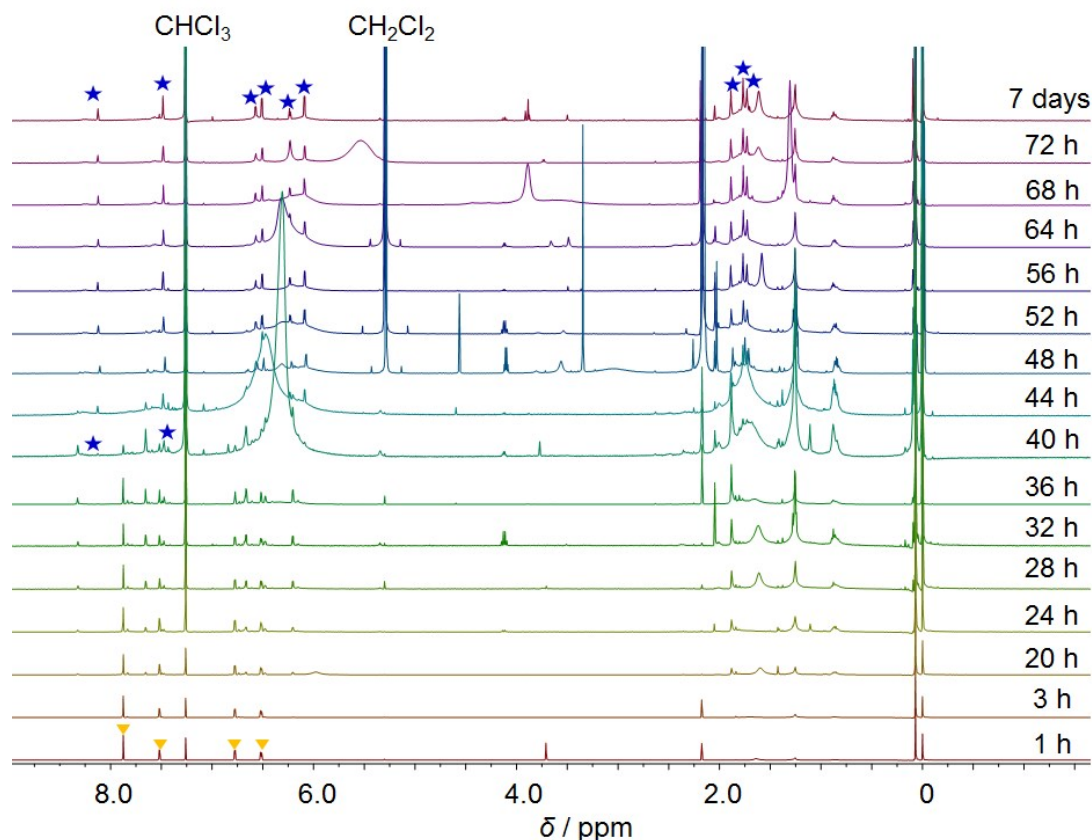

**Figure S21.** <sup>1</sup>H NMR spectra of the reaction mixture during the reaction course. The blue stars (**top**) correspond to the peaks of macrocycle **1**. The yellow triangles correspond to the peak of the reactant **TFB** (**bottom**).

The <sup>1</sup>H NMR spectra indicated that the reactant **TFB** was consumed after 40 h. After that, a set of sharp resonances were observed in the <sup>1</sup>H NMR spectra corresponding to the macrocycle **1**. The byproducts with substantial amount were not observable, because their resonances broaden out into the baseline. Between 32 h and 40 h, a set of tiny peaks were observed, which might correspond to half-macrocycle containing two or three TFB units.

## 6. Diels-Alder reactivity of **1**

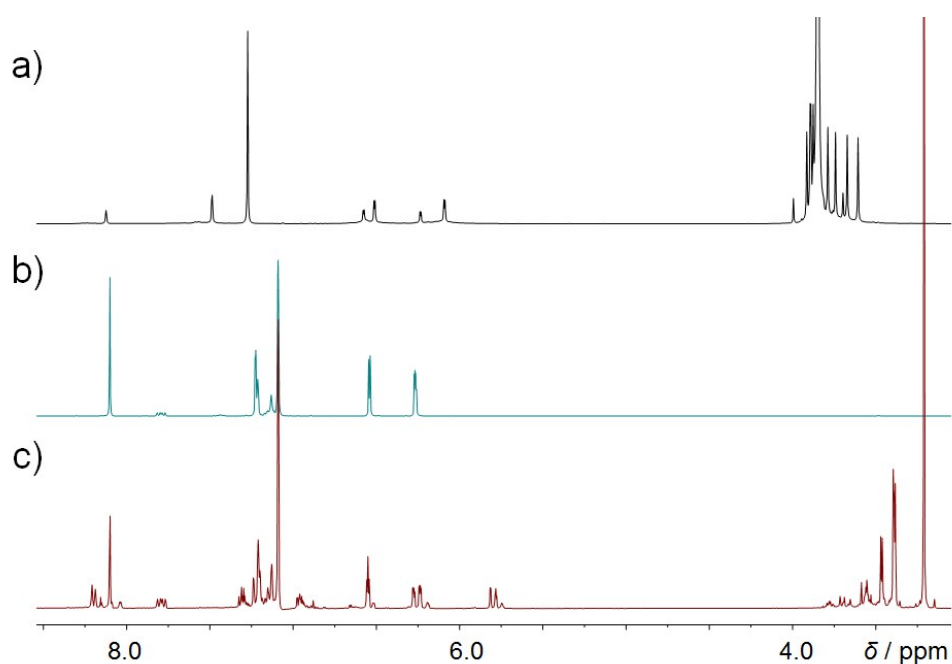

**Figure S22.** a) <sup>1</sup>H NMR spectrum of the mixture of **1** and dimethyl acetylenedicarboxylate after heating at 50 °C for 40h (CDCl<sub>3</sub>, 500MHz). b) <sup>1</sup>H NMR spectrum of TFB (toluene-*d*<sub>8</sub>, 500MHz). c) <sup>1</sup>H NMR spectrum of the mixture of **1** and dimethyl acetylenedicarboxylate after heating at 50 °C for 24h (toluene-*d*<sub>8</sub>, 500MHz).

Diels-Alder reaction was observed (Figure S22 b, c) to occur by heating dimethyl acetylenedicarboxylate and 1,3,5-tri(furan-2-yl) benzene (TFB). As a comparison, such reaction did not occur (Figure S22 a) by heating **1** and dimethyl acetylenedicarboxylate after heating at 50 °C for 40h. We thus reasonably propose that the failure of the ring **1** in Diels-Alder reaction resulted from steric hindrance caused by the dimethyl bridges (the acetone residues).



## 7. X-ray crystallography

### Methods

Single crystals of **1**, suitable for X-ray crystallography, were grown by slow vapor diffusion of diethyl ether into a solution of **1** in CHCl<sub>3</sub> after two weeks. Data were collected at 173 K on a Bruker D8 Venture Diffractometer equipped with a GaK $\alpha$  I $\mu$ S source and MX optic.

### Crystal parameters

[C<sub>90</sub>H<sub>72</sub>O<sub>12</sub>], colorless block (0.05 × 0.03 × 0.02 mm), triclinic, space group P -1,  $a = 11.934(8)$  Å,  $b = 12.680(8)$  Å,  $c = 15.587(11)$  Å,  $\alpha = 83.19(2)^\circ$ ,  $\beta = 70.854(15)^\circ$ ,  $\gamma = 69.918(19)^\circ$ ,  $V = 2093(2)$  Å<sup>3</sup>,  $Z = 1$ ,  $T = 173$  K,  $\rho_{\text{calc}} = 1.068$  g/cm<sup>3</sup>,  $\mu(\text{GaK}\alpha) = 1.34139$  mm<sup>-1</sup>. A total of 8284 reflections were collected, of which 2701 were unique. Final  $R_1(I > 2\sigma(I)) = 0.1412$  and  $wR_2 = 0.4399$  (all data). The structure was solved by direct method and different Fourier syntheses. Using Olex2, the structure was solved with the ShelXT structure solution program using Intrinsic Phasing and refined with the ShelXL refinement package using Least Squares minimization. The SQUEEZE procedure was done (see details in the cif file). The quality of the crystal is limited due to its easy collapse. CCDC number: 2058306.

### Solid-state structure

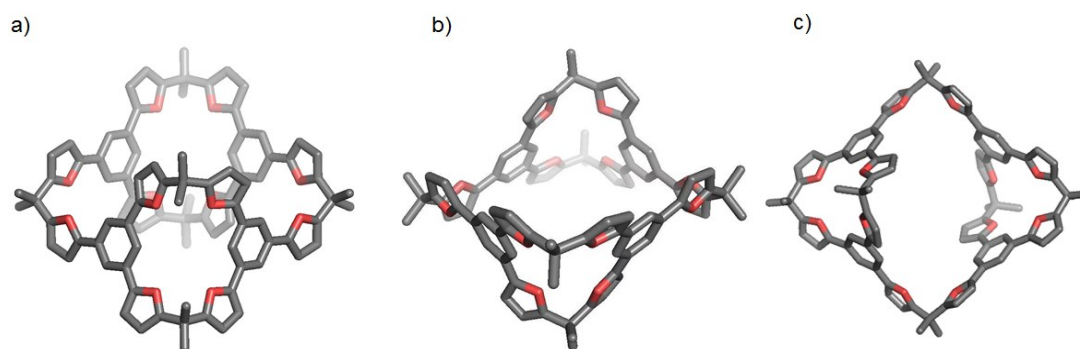

**Figure S23.** Different views of the solid-state structure of **1**. Color code: Carbon, grey; oxygen red; Disordered solvent molecules, and hydrogen atoms are omitted for clarity.

### Cartesian Coordinates for 1

|   |    |          |         |        |
|---|----|----------|---------|--------|
| 1 | O1 | 7.8768   | 5.4973  | 2.4899 |
| 2 | O2 | 5.2463   | 4.1311  | 2.2867 |
| 3 | O3 | 2.6126   | -1.8653 | 5.451  |
| 4 | O4 | 7.465    | -0.1609 | 1.577  |
| 5 | O5 | 10.14021 | 2.239   | 1.8936 |

|    |     |                |        |
|----|-----|----------------|--------|
| 6  | O6  | 13.69673.8944  | 6.5774 |
| 7  | C1  | 7.1108 6.5798  | 2.1351 |
| 8  | C2  | 5.8668 6.2954  | 1.2825 |
| 9  | C3  | 4.899 5.4364   | 2.1071 |
| 10 | C4  | 4.2635 3.5466  | 3.0259 |
| 11 | C5  | 3.302 4.4462   | 3.2777 |
| 12 | H5  | 2.4923 4.2998  | 3.752  |
| 13 | C6  | 3.7406 5.6594  | 2.6887 |
| 14 | H6  | 3.2782 6.489   | 2.7119 |
| 15 | C7  | 4.3728 2.098   | 3.3042 |
| 16 | C8  | 3.5142 1.4858  | 4.1803 |
| 17 | H8  | 2.877 2.0096   | 4.6512 |
| 18 | C9  | 3.5629 0.1105  | 4.3953 |
| 19 | C10 | 2.629 -0.4847  | 5.3155 |
| 20 | C11 | 1.6479 -2.1785 | 6.3359 |
| 21 | C12 | 1.0355 -1.044  | 6.7939 |
| 22 | H12 | 0.3288 -0.9883 | 7.4261 |
| 23 | C13 | 1.6749 0.0269  | 6.1283 |
| 24 | H13 | 1.4709 0.949   | 6.234  |
| 25 | C14 | 4.5372 -0.6158 | 3.7062 |
| 26 | H14 | 4.597 -1.553   | 3.8484 |
| 27 | C15 | 5.4029 -0.0286 | 2.8389 |
| 28 | C16 | 6.3457 -0.8068 | 2.0511 |
| 29 | C17 | 8.195 -1.0792  | 0.8467 |
| 30 | C18 | 9.5172 -0.5646 | 0.3387 |
| 31 | C19 | 10.3259-0.084  | 1.5034 |
| 32 | C20 | 10.89541.416   | 3.0082 |
| 33 | C21 | 11.566 0.2856  | 3.341  |

|    |      |                |         |
|----|------|----------------|---------|
| 34 | H21  | 12.18110.1714  | 4.0562  |
| 35 | C22  | 11.1595-0.6841 | 2.4045  |
| 36 | H22  | 11.419 -1.5979 | 2.3989  |
| 37 | C23  | 10.89392.774   | 3.5957  |
| 38 | C24  | 9.9236 3.6915  | 3.1452  |
| 39 | H24  | 9.3132 3.4581  | 2.4547  |
| 40 | C25  | 9.8819 4.9555  | 3.74    |
| 41 | C26  | 8.9359 5.9517  | 3.2939  |
| 42 | C27  | 8.8093 7.3066  | 3.4249  |
| 43 | H27  | 9.382 7.8854   | 3.9136  |
| 44 | C28  | 7.6509 7.6815  | 2.6857  |
| 45 | H28  | 7.3147 8.5658  | 2.596   |
| 46 | C29  | 10.79565.2969  | 4.7442  |
| 47 | H29  | 10.76576.1665  | 5.1254  |
| 48 | C30  | 11.73774.3924  | 5.1889  |
| 49 | C31  | 12.63754.7379  | 6.2697  |
| 50 | C32  | 14.4 4.4232    | 7.645   |
| 51 | C33  | 15.65683.7212  | 8.0955  |
| 52 | C34  | 16.71063.8304  | 6.9794  |
| 53 | H34A | 16.41153.3229  | 6.1966  |
| 54 | H34B | 17.56343.4662  | 7.2982  |
| 55 | H34C | 16.82974.7714  | 6.7332  |
| 56 | C35  | 16.18974.3836  | 9.3751  |
| 57 | H35A | 16.95663.8751  | 9.711   |
| 58 | H35B | 15.48284.3957  | 10.0543 |
| 59 | H35C | 16.467 5.3017  | 9.1759  |
| 60 | C36  | 13.77195.5522  | 8.0042  |
| 61 | H36  | 14.02956.1206  | 8.7198  |

|    |      |                |         |
|----|------|----------------|---------|
| 62 | C37  | 12.64685.7655  | 7.1384  |
| 63 | H37  | 12.03236.4891  | 7.1718  |
| 64 | C38  | 11.79213.1164  | 4.5778  |
| 65 | H38  | 12.45542.4928  | 4.8488  |
| 66 | C39  | 10.2453-1.7493 | -0.3328 |
| 67 | H39A | 11.0706-1.4296 | -0.7529 |
| 68 | H39B | 9.6638 -2.1465 | -1.0137 |
| 69 | H39C | 10.4637-2.424  | 0.3443  |
| 70 | C40  | 9.2885 0.6088  | -0.6655 |
| 71 | H40A | 8.8336 1.3465  | -0.2077 |
| 72 | H40B | 8.7349 0.297   | -1.4118 |
| 73 | H40C | 10.15250.9196  | -1.0073 |
| 74 | C41  | 7.5061 -2.2381 | 0.8319  |
| 75 | H41  | 7.7697 -3.031  | 0.3806  |
| 76 | C42  | 6.3327 -2.0829 | 1.5976  |
| 77 | H42  | 5.6676 -2.7401 | 1.7615  |
| 78 | C43  | 5.3462 1.3815  | 2.6607  |
| 79 | H43  | 5.9774 1.821   | 2.1032  |
| 80 | C44  | 5.2005 7.6162  | 0.9365  |
| 81 | H44A | 4.85 8.0295    | 1.7525  |
| 82 | H44B | 4.4643 7.4552  | 0.3094  |
| 83 | H44C | 5.8567 8.2148  | 0.5224  |
| 84 | C45  | 6.2459 5.5545  | 0.0177  |
| 85 | H45A | 6.8655 6.1014  | -0.5083 |
| 86 | H45B | 5.4399 5.3742  | -0.5087 |
| 87 | H45C | 6.6785 4.7066  | 0.2537  |
| 88 | O1   | 9.1694 -5.3983 | 12.2346 |
| 89 | O2   | 11.7999-4.0322 | 12.4378 |

|     |     |                |                 |
|-----|-----|----------------|-----------------|
| 90  | O3  | 14.43361.9642  | 9.2735          |
| 91  | O4  | 9.5812         | 0.2598 13.1475  |
| 92  | O5  | 6.906          | -1.1249 12.8309 |
| 93  | O6  | 3.3495         | -3.7955 8.1471  |
| 94  | C1  | 9.9354         | -6.4809 12.5894 |
| 95  | C2  | 11.1794-6.1965 | 13.442          |
| 96  | C3  | 12.1472-5.3374 | 12.6174         |
| 97  | C4  | 12.7827-3.4477 | 11.6986         |
| 98  | C5  | 13.7442-4.3473 | 11.4468         |
| 99  | H5  | 14.5539-4.2009 | 10.9725         |
| 100 | C6  | 13.3056-5.5605 | 12.0358         |
| 101 | H6  | 13.7679-6.3901 | 12.0126         |
| 102 | C7  | 12.6734-1.999  | 11.4203         |
| 103 | C8  | 13.532         | -1.3868 10.5442 |
| 104 | H8  | 14.1691-1.9106 | 10.0733         |
| 105 | C9  | 13.4833-0.0116 | 10.3292         |
| 106 | C10 | 14.41710.5837  | 9.4089          |
| 107 | C11 | 15.39822.2774  | 8.3885          |
| 108 | C12 | 16.01071.143   | 7.9306          |
| 109 | H12 | 16.71731.0873  | 7.2984          |
| 110 | C13 | 15.37120.0721  | 8.5962          |
| 111 | H13 | 15.5753-0.8501 | 8.4905          |
| 112 | C14 | 12.50890.7147  | 11.0183         |
| 113 | H14 | 12.44911.652   | 10.8761         |
| 114 | C15 | 11.64330.1275  | 11.8856         |
| 115 | C16 | 10.70040.9057  | 12.6734         |
| 116 | C17 | 8.8511         | 1.1782 13.8778  |
| 117 | C18 | 7.529          | 0.6635 14.3858  |

|     |      |         |         |         |
|-----|------|---------|---------|---------|
| 118 | C19  | 6.7202  | 0.1829  | 13.2211 |
| 119 | C20  | 6.1507  | -1.317  | 11.7163 |
| 120 | C21  | 5.4802  | -0.1867 | 11.3835 |
| 121 | H21  | 4.865   | -0.0724 | 10.6683 |
| 122 | C22  | 5.8867  | 0.783   | 12.32   |
| 123 | H22  | 5.6271  | 1.6969  | 12.3256 |
| 124 | C23  | 6.1523  | -2.675  | 11.1288 |
| 125 | C24  | 7.1226  | -3.5926 | 11.5793 |
| 126 | H24  | 7.733   | -3.3592 | 12.2698 |
| 127 | C25  | 7.1643  | -4.8566 | 10.9845 |
| 128 | C26  | 8.1103  | -5.8527 | 11.4306 |
| 129 | C27  | 8.2369  | -7.2077 | 11.2996 |
| 130 | H27  | 7.6641  | -7.7864 | 10.8109 |
| 131 | C28  | 9.3953  | -7.5826 | 12.0387 |
| 132 | H28  | 9.7315  | -8.4668 | 12.1285 |
| 133 | C29  | 6.2505  | -5.1979 | 9.9803  |
| 134 | H29  | 6.2805  | -6.0676 | 9.599   |
| 135 | C30  | 5.3085  | -4.2935 | 9.5356  |
| 136 | C31  | 4.4086  | -4.6389 | 8.4548  |
| 137 | C32  | 2.6461  | -4.3243 | 7.0795  |
| 138 | C33  | 1.3894  | -3.6223 | 6.629   |
| 139 | C34  | 0.3355  | -3.7315 | 7.7451  |
| 140 | H34A | 0.6347  | -3.2239 | 8.5279  |
| 141 | H34B | -0.5173 | -3.3672 | 7.4263  |
| 142 | H34C | 0.2164  | -4.6724 | 7.9913  |
| 143 | C35  | 0.8565  | -4.2847 | 5.3494  |
| 144 | H35A | 0.0895  | -3.7762 | 5.0135  |
| 145 | H35B | 1.5634  | -4.2967 | 4.6702  |

|     |      |         |         |         |
|-----|------|---------|---------|---------|
| 146 | H35C | 0.5791  | -5.2027 | 5.5486  |
| 147 | C36  | 3.2743  | -5.4533 | 6.7203  |
| 148 | H36  | 3.0167  | -6.0217 | 6.0047  |
| 149 | C37  | 4.3994  | -5.6666 | 7.5861  |
| 150 | H37  | 5.0138  | -6.3901 | 7.5527  |
| 151 | C38  | 5.2541  | -3.0175 | 10.1466 |
| 152 | H38  | 4.5908  | -2.3939 | 9.8757  |
| 153 | C39  | 6.8008  | 1.8482  | 15.0573 |
| 154 | H39A | 5.9756  | 1.5285  | 15.4774 |
| 155 | H39B | 7.3823  | 2.2455  | 15.7382 |
| 156 | H39C | 6.5825  | 2.5229  | 14.3802 |
| 157 | C40  | 7.7576  | -0.5099 | 15.39   |
| 158 | H40A | 8.2125  | -1.2475 | 14.9322 |
| 159 | H40B | 8.3113  | -0.198  | 16.1363 |
| 160 | H40C | 6.8936  | -0.8207 | 15.7318 |
| 161 | C41  | 9.5401  | 2.337   | 13.8926 |
| 162 | H41  | 9.2765  | 3.13    | 14.3439 |
| 163 | C42  | 10.7135 | 2.1818  | 13.1269 |
| 164 | H42  | 11.3786 | 2.8391  | 12.963  |
| 165 | C43  | 11.7    | -1.2825 | 12.0638 |
| 166 | H43  | 11.0688 | -1.7221 | 12.6212 |
| 167 | C44  | 11.8457 | -7.5173 | 13.788  |
| 168 | H44A | 12.1961 | -7.9305 | 12.972  |
| 169 | H44B | 12.5818 | -7.3563 | 14.4151 |
| 170 | H44C | 11.1894 | -8.1159 | 14.2021 |
| 171 | C45  | 10.8003 | -5.4556 | 14.7068 |
| 172 | H45A | 10.1807 | -6.0025 | 15.2328 |
| 173 | H45B | 11.6063 | -5.2753 | 15.2332 |

## 8. References.

[s1] Hazra, C., Gandhamsetty, N., Park, S. *et al.* Borane catalysed ring opening and closing cascades of furans leading to silicon functionalized synthetic intermediates. *Nat Commun*, **2016**, *7*, 13431.

[s2] a) Hirose, K., Determination of Binding Constants. In *Analytical Methods in Supramolecular Chemistry*, **2006**; pp 17-54; b) R. P. Ashton, R. Ballardini, V. Balzani, M. Belohradsky, M. T. Gandolfi, D. Philp, L. Prodi, F. M. Raymo, M. V. Reddington, N. Spencer, J. F. Stoddart, M. Venturi, D. J. Williams, *J. Am. Chem. Soc.*, **1996**, *118*, 4931–4951; c) Y. Inoue, K. Yamamoto, T. Wada, S. Everitt, X.-M. Gao, Z.-J. Hou, L.-H. Tong, S.-K. Jiang, H.-M. Wu, *J. Chem. Soc., Perkin Trans. 2*, **1998**, 1807–1816.
